# Supplementary material
Source: PubMed Central journal article supplement (PMC3869010)
Supplement: ismej2013131x15.pdf [file ismej2013131x15.pdf]

## Supplementary Methods

***N*-glycan preparation.** Gastropod hemolymph 20  $\mu$ l was mixed with 30  $\mu$ l of 330 mM ammonium bicarbonate and 60  $\mu$ l of 0.02 % (w/v) PHM-LIPOSORB (Merck) in 0.5 mM ammonium bicarbonate, and incubated at 37 °C for 10 min. As an internal standard, 2  $\mu$ l of 0.5 mM maltohexaose was added. Then the samples were reduced by 10  $\mu$ l of 120 mM dithiothreitol (DTT) at 60 °C for 30 min and alkylated with 20  $\mu$ l of iodoacetamide (IAA) by incubation in the dark at room temperature for 1 h (Kita *et al.*, 2007). Trypsin (Sigma-Aldrich) 400 units was added and incubated at 37 °C over night, followed by inactivation at 90 °C for 10 min. After cooling to room temperature, *N*-glycans were released with 2 units of PNGase F (Roche) at 37 °C over night. Glycoblotting by means of BlotGlyco beads (Sumitomo Bakelite) was performed according to the procedure described previously (Amano *et al.*, 2010, Furukawa *et al.*, 2008, Hirose *et al.*, 2011, Nagahori *et al.*, 2013, Nishimura *et al.*, 2004). BlotGlyco beads (10 mg/ml suspension; Sumitomo Bakelite Co., Ltd.) were aliquoted onto one well of a MultiScreen Solvinert filter plate (Millipore, Billerica, MA). To capture total glycans in sample mixtures specifically onto beads via stable hydrazone bonds, 20  $\mu$ l of PNGase F-digested samples and 180  $\mu$ l of 2 % acetic acid in acetonitrile were added and incubated at 85 °C for 45 min. The beads were washed with 200  $\mu$ l of 2 M guanidine HCl in ammonium bicarbonate followed by washing with the same volume of water and 1 % triethylamine in methanol (MeOH). Each washing step was performed in triplicate, respectively. Unreacted hydrazide functional groups on beads were capped by incubation with 10 % acetic anhydride in MeOH for 30 min at room temperature. The solution was removed by vacuum, and then the beads were serially washed by MeOH, 10 mM HCl, water, and dimethyl sulfoxide (DMSO), respectively. On-beads methyl esterification of carboxyl groups in sialic acids was carried out by incubation with 100  $\mu$ l of 500 mM 3-methyl-1- $\rho$ -tolyltriazen in a 1:1 mixture of acetonitrile and DMSO at 60 °C for 1 h (Miura *et al.*, 2007). Then the beads were serially washed by 200  $\mu$ l of MeOH and water. The glycans blotted on beads were subjected to the *trans*-iminization reaction with aoWR (N <sup>$\alpha$</sup> -((aminooxy)acetyl)tryptophanylarginine methyl ester) (Shimaoka *et al.*, 2007, Shinohara *et al.*, 2004, Uematsu *et al.*, 2005). 2  $\mu$ l of 20 mM aoWR and 18  $\mu$ l of 2 % acetic acid in acetonitrile were added and incubated at 85 °C for 45 min. WR-tagged glycans were eluted by adding 50  $\mu$ l of water and then purified using HILIC spin columns. The purified samples were immediately subjected to

MALDI-TOF MS analysis or dried and stored at -30 °C until use.

### Supplementary References

- Altschul S, Madden T, Schäffer A, Zhang J, Zhang Z, Miller W *et al.* (1997). Gapped BLAST and PSI-BLAST: a new generation of protein database search programs. *Nucleic Acids Res* **25**: 3389-3402.
- Amano M, Yamaguchi M, Takegawa Y, Yamashita T, Terashima M, Furukawa J *et al.* (2010). Threshold in stage-specific embryonic glycotypes uncovered by a full portrait of dynamic *N*-glycan expression during cell differentiation. *Mol Cell Proteomics* **9**: 523-537.
- Furukawa J, Shinohara Y, Kuramoto H, Miura Y, Shimaoka H, Kurogochi M *et al.* (2008). Comprehensive approach to structural and functional glycomics based on chemoselective glycoblotting and sequential tag conversion. *Anal Chem* **80**: 1094-1101.
- Hirose K, Amano M, Hashimoto R, Lee Y, Nishimura S. (2011). Insight into glycan diversity and evolutionary lineage based on comparative Avio-*N*-glycomics and sialic acid analysis of 88 egg whites of Galloanserae. *Biochemistry* **50**: 4757-4774.
- Kita Y, Miura Y, Furukawa J, Nakano M, Shinohara Y, Ohno M *et al.* (2007). Quantitative glycomics of human whole serum glycoproteins based on the standardized protocol for liberating *N*-glycans. *Mol Cell Proteomics* **6**: 1437-1445.
- Miura Y, Shinohara Y, Furukawa J, Nagahori N, Nishimura S. (2007). Rapid and simple solid-phase esterification of sialic acid residues for quantitative glycomics by mass spectrometry. *Chemistry* **13**: 4797-4804.
- Nagahori N, Yamashita T, Amano M, Nishimura S. (2013). Effect of ganglioside GM3 synthase gene knockout on the glycoprotein *N*-glycan profile of mouse embryonic fibroblast. *Chembiochem* **14**: 73-82.
- Nishimura S, Niikura K, Kurogochi M, Matsushita T, Fumoto M, Hinou H *et al.* (2004). High-throughput protein glycomics: combined use of chemoselective glycoblotting and MALDI-TOF/TOF mass spectrometry. *Angew Chem Int Ed Engl* **44**: 91-96.
- Shimaoka H, Kuramoto H, Furukawa J, Miura Y, Kurogochi M, Kita Y *et al.* (2007). One-pot solid-phase glycoblotting and probing by transoximization for high-throughput glycomics and glycoproteomics. *Chemistry* **13**: 1664-1673.
- Shinohara Y, Furukawa J, Niikura K, Miura N, Nishimura S. (2004). Direct *N*-glycan

profiling in the presence of tryptic peptides on MALDI-TOF by controlled ion enhancement and suppression upon glycan-selective derivatization. *Anal Chem* **76**: 6989-6997.

Uematsu R, Furukawa J, Nakagawa H, Shinohara Y, Deguchi K, Monde K *et al.* (2005). High throughput quantitative glycomics and glycoform-focused proteomics of murine dermis and epidermis. *Mol Cell Proteomics* **4**: 1977-1989.
